# Supplementary material
Source: PubMed Central journal article supplement (PMC5527609)
Supplement: AAC.00164-17_zac008176405s1.pdf [file AAC.00164-17_zac008176405s1.pdf]

1 **SUPPLEMENTARY MATERIAL**

2 **MATERIAL AND METHODS**

3 **Definitions**

4           The Multinational Association for Supportive Care in Cancer (MASCC) score was  
5 calculated as described elsewhere. Neutropenia was defined as an absolute neutrophil  
6 count  $<500/\text{mm}^3$ . The presence of comorbidities was described as the presence of at  
7 least one of the following conditions: i) diabetes mellitus, ii) chronic pulmonary  
8 obstructive disease, iii) chronic miocardiopathy, iv) chronic liver disease, and v) chronic  
9 renal disease. Shock was defined as a systolic pressure  $<90$  mmHg that was  
10 unresponsive to fluid treatment or required vasoactive drug therapy. Low-risk  
11 bloodstream infection (BSI) was considered when the infection originated in the  
12 urinary tract, or was secondary to catheter infection or to gut translocation  
13 (endogenous source). Episodes of BSI originating in any other source were considered  
14 complex BSI.

15           Treatment with a  $\beta$ -lactam/ $\beta$ -lactamase inhibitor (BLBLI) or a carbapenem was  
16 considered as monotherapy if no other drug with activity against Gram-negatives was  
17 coadministered, irrespective of isolate susceptibility

18           Case-fatality rates were defined as death by any cause within 7, 14 and 30 days  
19 of the BSI episode. Persistent BSI was defined as positive blood cultures beyond the  
20 first 48 hours of adequate antibiotic therapy. Relapse of BSI was defined as positive  
21 blood cultures for the same microorganism occurring within 7 days of treatment  
22 discontinuation.

23 **Statistical analysis**

24 The variables included in the propensity score analysis of the empirical therapy cohort  
25 (ETC) were age, sex, acute leukemia, hematopoietic stem cell transplant,  
26 comorbidities, previous corticosteroids, previous antibiotics, previous hospitalization,  
27 profound neutropenia ( $<100/\text{mm}^3$ ), days of previous neutropenia, MASCC score  $<21$ ,  
28 previous episode of BSI, complex BSI, coinfection, septic shock at presentation, and  
29 empirical combination therapy. The variables included in the propensity score analysis  
30 of the definitive therapy cohort (DTC) were age, sex, comorbidities, acute leukemia,  
31 hematopoietic stem cell transplant, previous episode of BSI, previous corticosteroids,  
32 profound neutropenia ( $<100/\text{mm}^3$ ), days of previous neutropenia, MASCC score  $<21$ ,  
33 complex BSI, coinfection, septic shock at presentation, source control, adequate  
34 empirical combination therapy, active targeted combination therapy and empirical  
35 monotherapy with an aminoglycoside.

36

## 37 **RESULTS**

### 38 **Microbiological studies**

39 The MIC for BLBLs was not available for six isolates from six patients who  
40 received these regimens; these isolates were considered either susceptible or resistant  
41 on the basis of local laboratory reports.

42 In the ETC, the MICs provided for patients who received PTZ were as follows:  $\leq$   
43 16 mg/L (11 isolates),  $\leq$  8 mg/L (16 isolates),  $\leq$  4 mg/L (10 isolates), 2 mg/L (two  
44 isolates), and  $< 1$  mg/L (one isolate). In the same cohort, the two available MICs for  
45 cefoperazone-sulbactam (C-S) were 16 mg/L, and the only available MIC for  
46 amoxicillin-clavulanate (AMC) was 8 mg/L. In the DTC, the MICs provided for patients

47 who received PTZ were as follows:  $\leq 16$  mg/L (one isolate),  $\leq 8$  mg/L (six isolates),  $\leq 4$   
48 mg/L (two isolates), and 2 mg/L (two isolates). The available MICs for AMC were 8  
49 mg/L (four isolates) and  $\leq 16$  mg/L (one isolate).

## 50 **Antibiotic data**

### 51 *Empirical therapy cohort*

52 Dosage regimens were available for 123 patients receiving carbapenems and for 44  
53 patients treated with BLBLIs. Among them,  $>80\%$  of patients received the following  
54 doses (adjusted in cases of renal failure): meropenem 1 g/8 h; imipenem 500 mg/6 h;  
55 ertapenem 1 gr/24 h. Two patients received meropenem in prolonged-infusion (2 g/8  
56 h and 1 g/6 h each, the latter combined with colistin). For PTZ, the great majority of  
57 patients received 4 g/8 h (44.1%), followed by 4.5 g/6 h (23.2%), 4 g/6 h (16.2%), and  
58 4.5 g/8 h (16.2%). The two patients treated with C-S received 2 g/12 h and the  
59 remaining two received 1 g/8 h of AMC.

60 Fifty-four patients received a second active antibiotic in combination with the  
61 administered  $\beta$ -lactam for  $\leq 48$  hours: carbapenem + aminoglycoside (26 patients),  
62 carbapenem + colistin (14 patients), PTZ + aminoglycoside (12 patients), carbapenem +  
63 ciprofloxacin (one patient) and carbapenem + colistin + aminoglycoside (one patient).

64 For patients who received empirical therapy with BLBLI, 30-day case-fatality  
65 rate was 26.4% (9/34) for those whose regimen was changed to a carbapenem. No  
66 deaths were recorded in the 12 patients continuing to receive a BLBLI or in the only  
67 patient who received ciprofloxacin. The remaining patient treated empirically with PTZ  
68 died within 48 hours of BSI. In patients empirically treated with carbapenems who  
69 continued with carbapenem, mortality was 15.5% (19/122 patients). One of the two

70 patients whose therapy was changed to tigecyclin died, whereas neither of the  
71 patients whose therapy was changed to BLBLI died.

72 *Definitive therapy cohort*

73 The dosage regimens were similar to those specified for the ETC. Two patients  
74 received meropenem in prolonged-infusion (1 g/6 h one patient, and 2 g/6 h one  
75 patient, combined with tigecyclin and aminoglycoside). An active combination therapy  
76 with the  $\beta$ -lactam was administered in 24 patients: carbapenem + aminoglycoside (19  
77 patients), carbapenem + colistin (three patients), PTZ + aminoglycoside (one patient),  
78 and carbapenem + tigecyclin + aminoglycoside (one patient).

79         Sixty-one patients in this cohort had received inadequate initial empirical  
80 antibiotic therapy: PTZ (n=32), cefepime (n=17), ceftazidime (n= 4), aztreonam (n=2),  
81 ceftriaxone (n=1), AMC (n=1), levofloxacin (n=1), C-S (n=1), ticarcillin-clavulanate (n=1),  
82 and no empirical therapy (n=1). Twenty-five patients had received monotherapy with  
83 an aminoglycoside. Among them, of the 23 patients whose therapy was changed to  
84 carbapenems, five died (21.7%). The two remaining patients were switched to  
85 ciprofloxacin and PTZ, and neither died.
